# Supplementary material for: Development of highly selective potentiometric thorium(iv) ion-selective electrode: exploration supported with optical and DFT analysis
Source: Royal Society of Chemistry journal article supplement (doi:10.1039/c8ay02740d), 2019-01-01
Supplement: c8ay02740d1.pdf [file c8ay02740d1.pdf]

*Electronic Supplementary information*

**Development of Highly Selective Potentiometric Thorium (IV) Ion-selective Electrode: Exploration Supported with Optical and DFT Analysis**

R. Selvakumar<sup>a</sup>, S.K. Ashok Kumar<sup>a\*</sup>, Kari Vijayakrishna<sup>a,d</sup>, Akella Sivaramakrishna<sup>a</sup>,  
C.V.S. BrahmmanandaRao<sup>b</sup>, N. Sivaraman<sup>b</sup>, and Suban K. Sahoo<sup>c</sup>.

<sup>a</sup> Department of Chemistry, School of Advanced Sciences, VIT University, Vellore-632014, Tamil Nadu, India.  
E-mail: ashokkumar.sk@vit.ac.in; ashok312002@gmail.com

<sup>b</sup> Indira Gandhi Centre for Atomic Research, Homi Bhabha National Institute, Kalpakkam-603102, Tamil Nadu, India.

<sup>c</sup> Department of Applied Chemistry, S. V. National Institute Technology, Surat-395007, Gujarat, India

<sup>d</sup> School of Basic Sciences, Indian Institute of Technology Bhubaneswar, Arugul, Khurda, Odisha, India-752050 India

**ESI Captions**

**Figure 1S:** <sup>1</sup>H NMR of HQ-Al

**Figure 2S:** <sup>13</sup>C NMR of HQ-Al

**Figure 3S:** Mass spectra of HQ-Al

**Figure 4S:** <sup>1</sup>H NMR of HQ-OH

**Figure 5S:** <sup>13</sup>C NMR of HQ-OH

**Figure 6S:** Mass spectra of HQ-OH

**Figure 7S:** <sup>1</sup>H NMR of HQ-MeCl

**Figure 8S:** <sup>13</sup>C NMR of HQ-MeCl

**Figure 9S:** Mass spectra of HQ-MeCl

**Figure 10S:** FT-IR spectra of L

**Figure 11S:** <sup>1</sup>H NMR spectra of L

**Figure 12S:** <sup>31</sup>P NMR spectra of L

**Figure 13S:** <sup>13</sup>C NMR spectra of L

**Figure 14S:** DEPT-135 NMR spectra of L

**Figure 15S:** HR-MS of L

**Figure 16S.** TDDFT based excitation spectra of L and L<sub>2</sub>Th<sup>4+</sup>

**Figure 17S:** Potentiometric titration plot represented using Gran's method

**Table 1S.** Comparison of experimental and theoretical UV-Vis spectral characteristics

**Table 2S.** Analytical performance of ISE-10

**Table 3S.** Assessment of present Th<sup>4+</sup>-ISE with previously reported work.

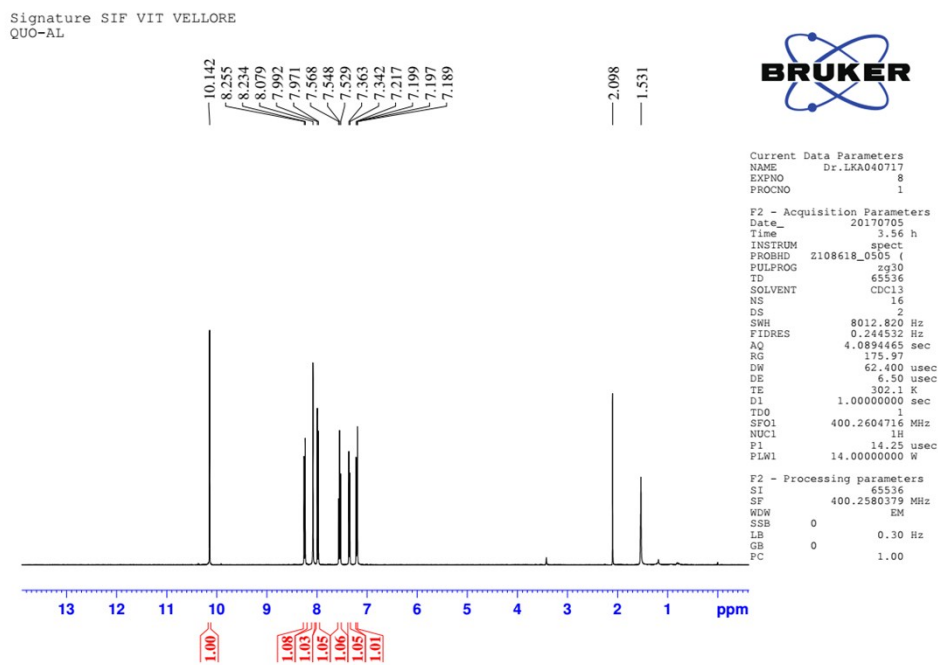

**Figure 1S:** <sup>1</sup>H NMR of HQ-AI

Signature SIF VIT VELLORE  
QUO-AL

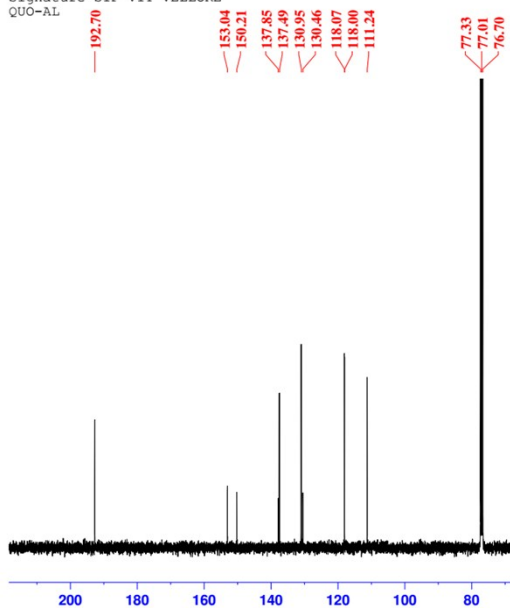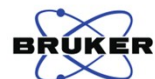

Current Data Parameters  
NAME: Dr.LKAO40717  
EXPNO: 9  
PROCNO: 1

F2 - Acquisition Parameters  
Date\_: 20170705  
Time: 4:24 h  
INSTRUM: spect  
PROBHD: e108618\_0505 (1  
PULPROG: zgpg30  
TD: 65536  
SOLVENT: CDCl3  
NS: 512  
DS: 4  
SWE: 24038.461 Hz  
FIDRES: 0.733596 Hz  
AQ: 1.3631486 sec  
RG: 112.69  
DW: 20.800 usec  
DE: 6.50 usec  
TE: 302.8 K  
D1: 2.0000000 sec  
D11: 0.0300000 sec  
TDO: 0.0000000 sec  
SFO1: 100.6550186 MHz  
NUC1: 13C  
P1: 9.80 usec  
PLM1: 58.0000000 W  
SFO2: 400.2536010 MHz  
NUC2: 1H  
CPCPRG12: waltz16  
PCPD2: 90.00 usec  
PLM2: 14.0000000 W  
PLM12: 0.25097000 W  
PLM13: 0.17654000 W

F2 - Processing parameters  
SI: 32768  
SF: 100.6449542 MHz  
WDW: EM  
SSB: 0  
LB: 1.00 Hz  
GB: 0  
PC: 1.40

Figure 2S: <sup>13</sup>C NMR of HQ-Al

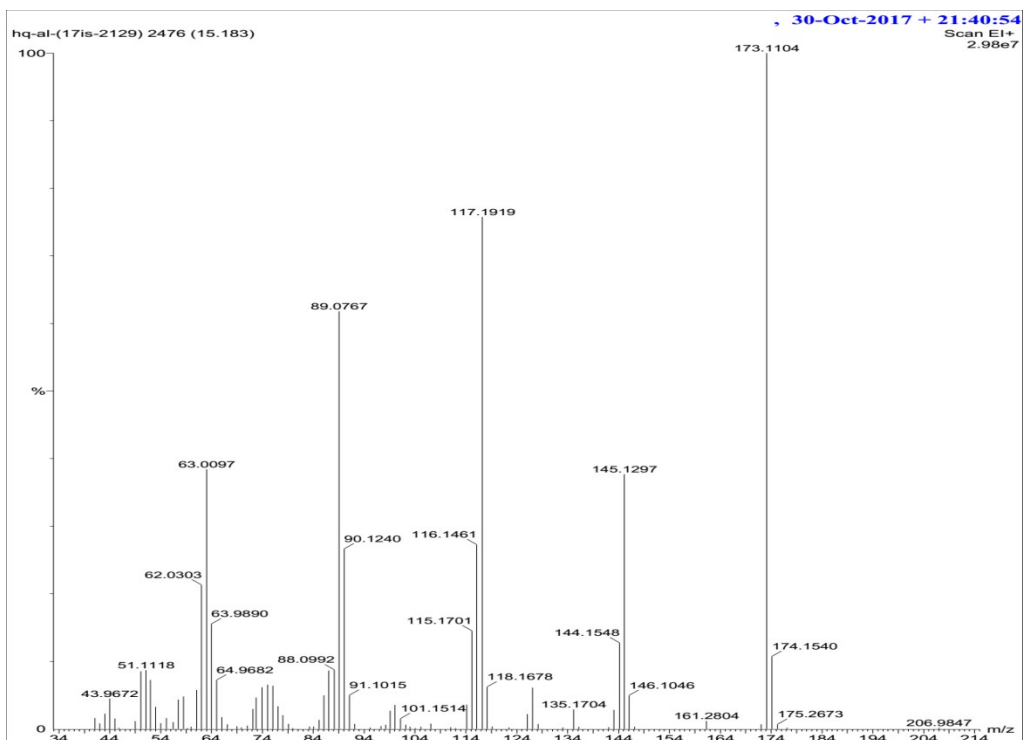

Figure 3S: Mass spectra of HQ-Al

Signature SIF VIT VELLORE  
HY-Q1

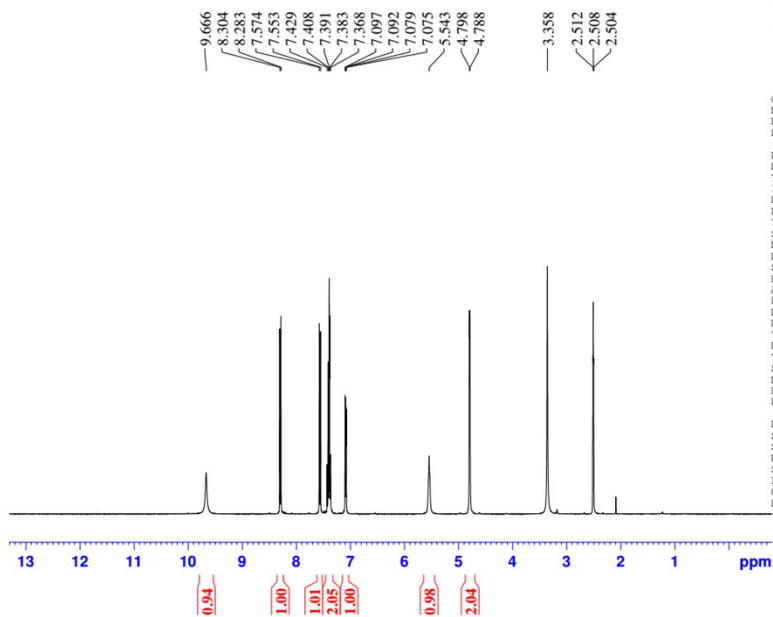

Figure 4S:  $^1\text{H}$  NMR of HQ-OH

Signature SIF VIT VELLORE  
HY-Q1

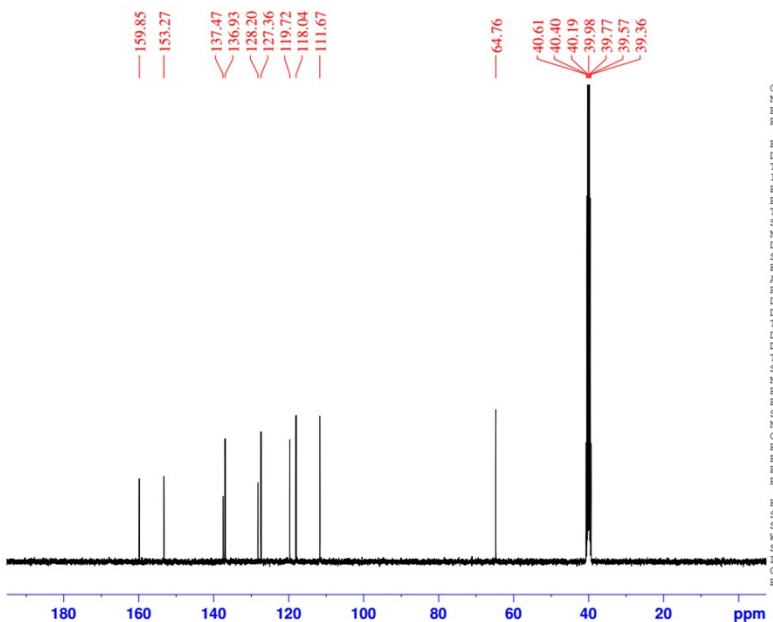

Figure 5S:  $^{13}\text{C}$  NMR of HQ-OH

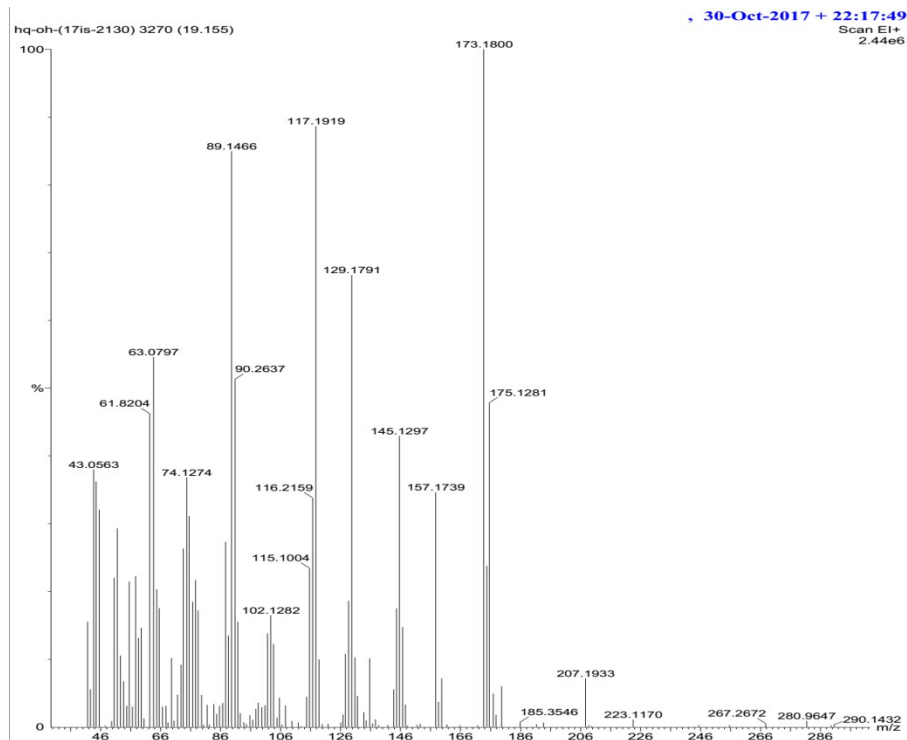

Figure 6S: Mass spectra of HQ-OH

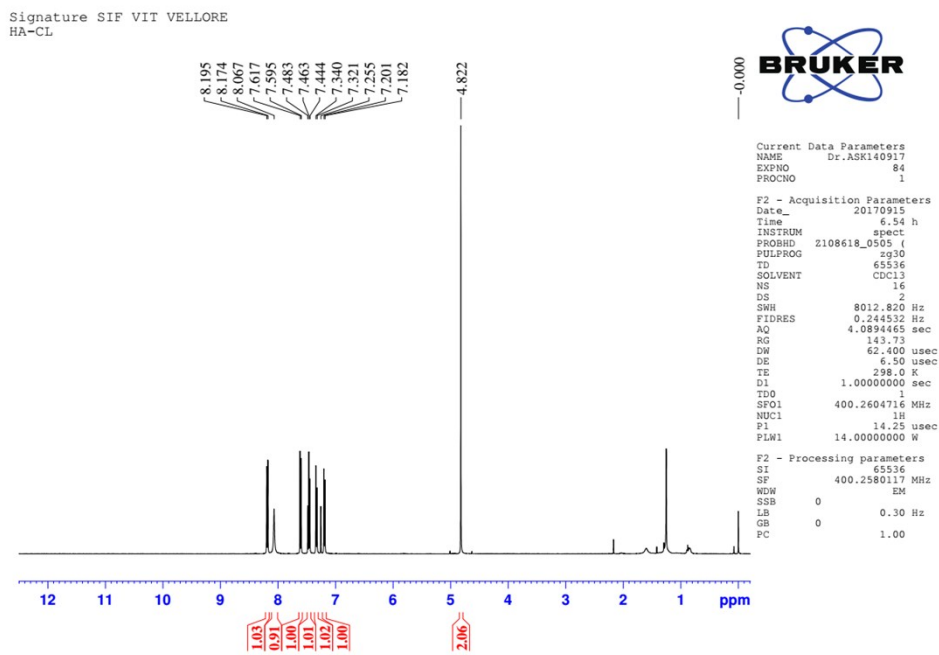

Figure 7S: <sup>1</sup>H NMR of HQ-MeCl

Signature SIF VIT VELLORE  
HA-CL

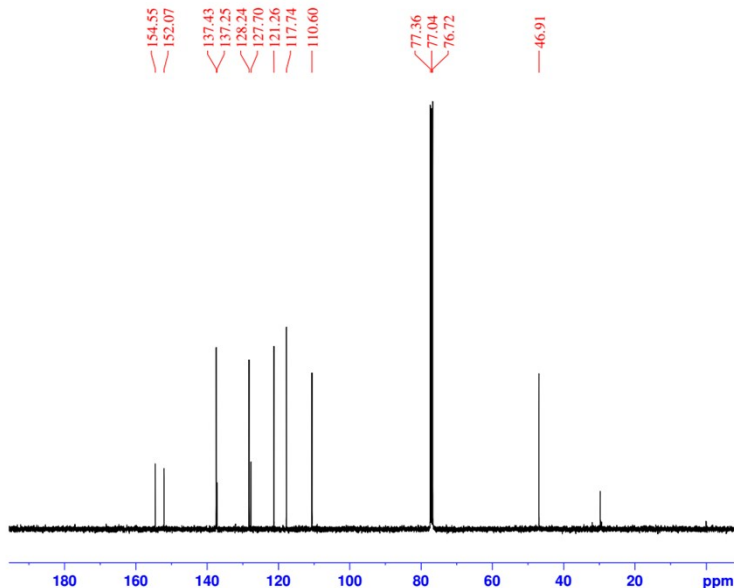

Figure 8S: <sup>13</sup>C NMR of HQ-MeCl

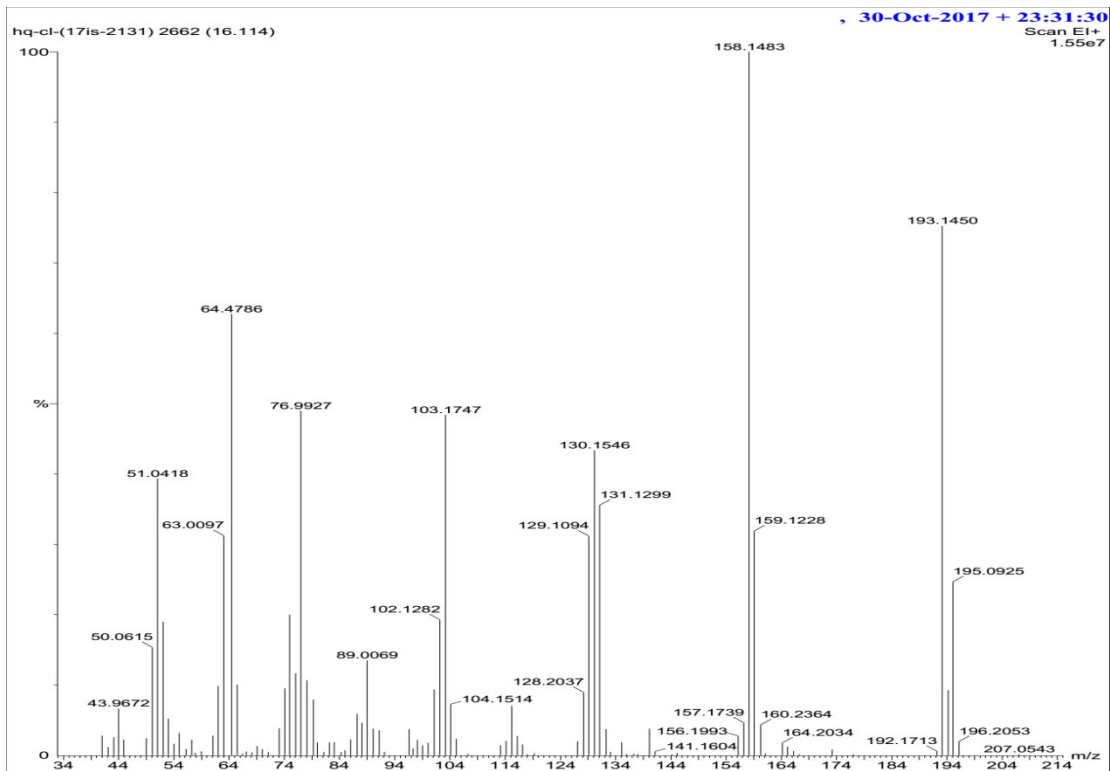

Figure 9S: Mass spectra of HQ-MeCl

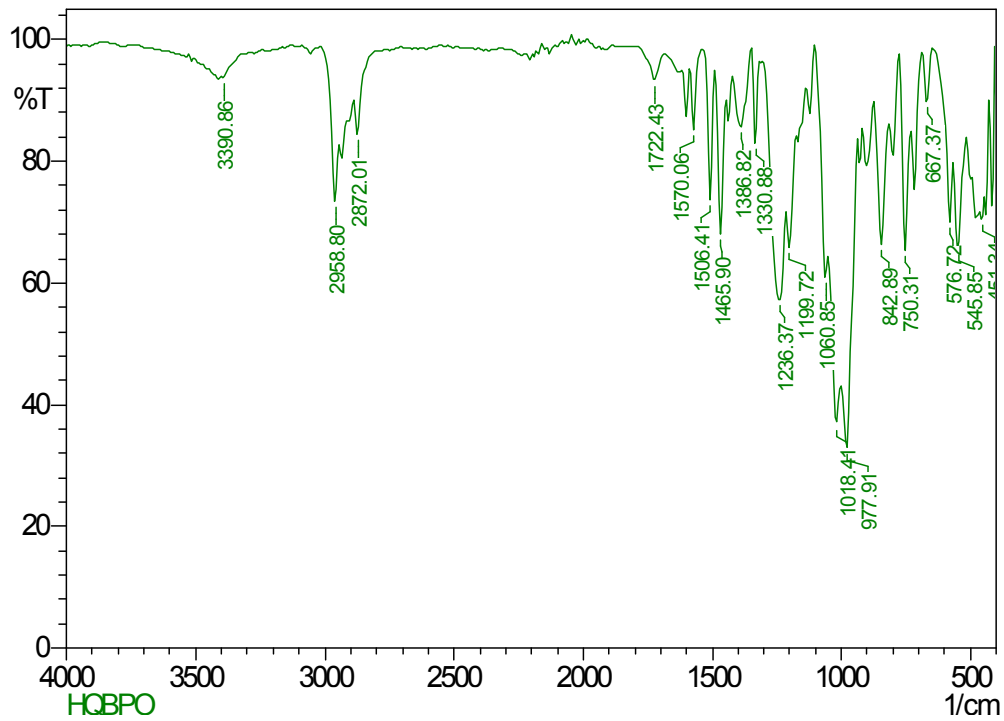

Figure 10S: FT-IR spectra of L

Signature SIF VIT VELLORE  
HQ-BPO

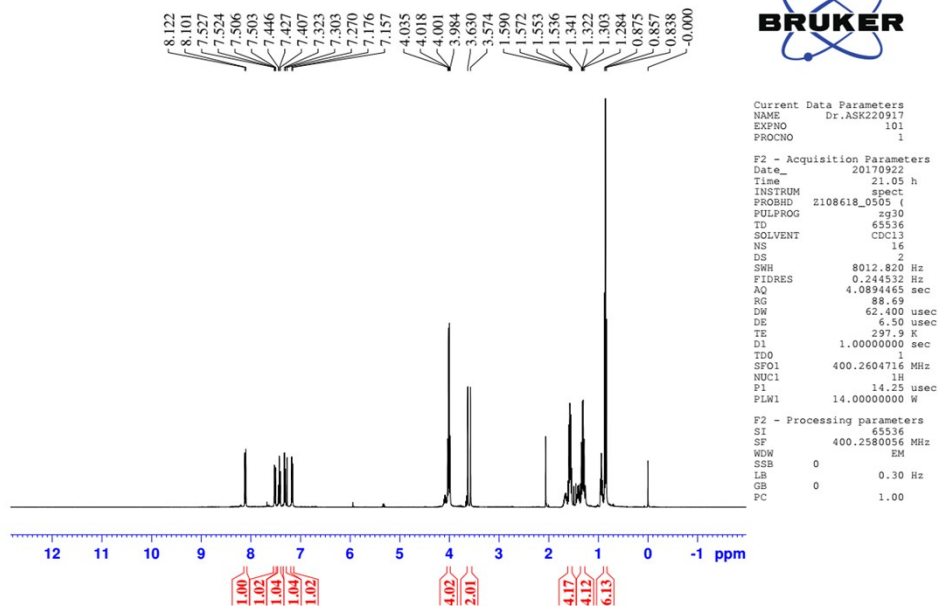

Figure 11S: <sup>1</sup>H NMR spectra of L

Signature SIF VIT VELLORE  
HQ-BPO

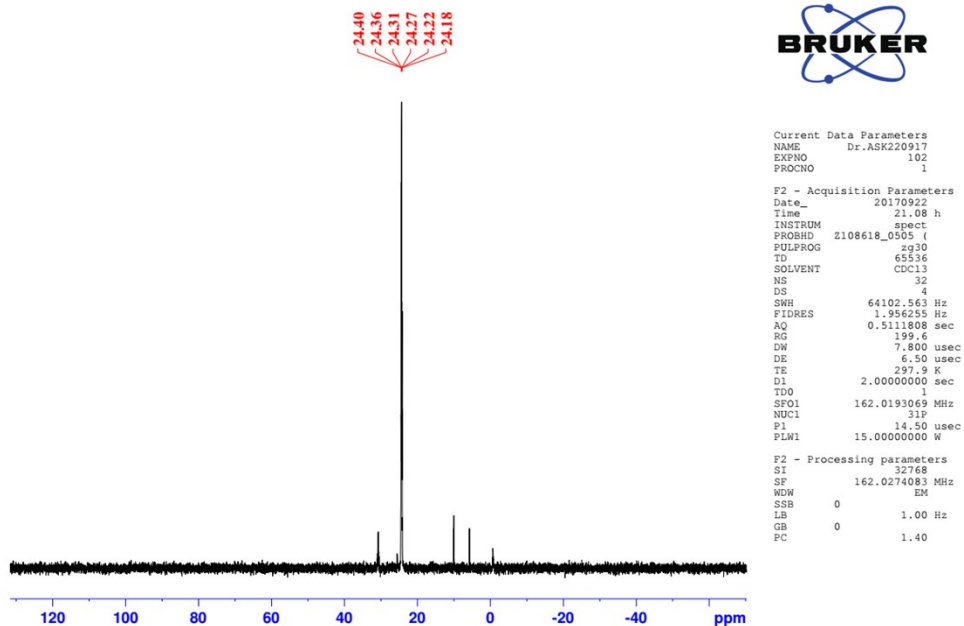

Figure 12S: <sup>31</sup>P NMR spectra of L

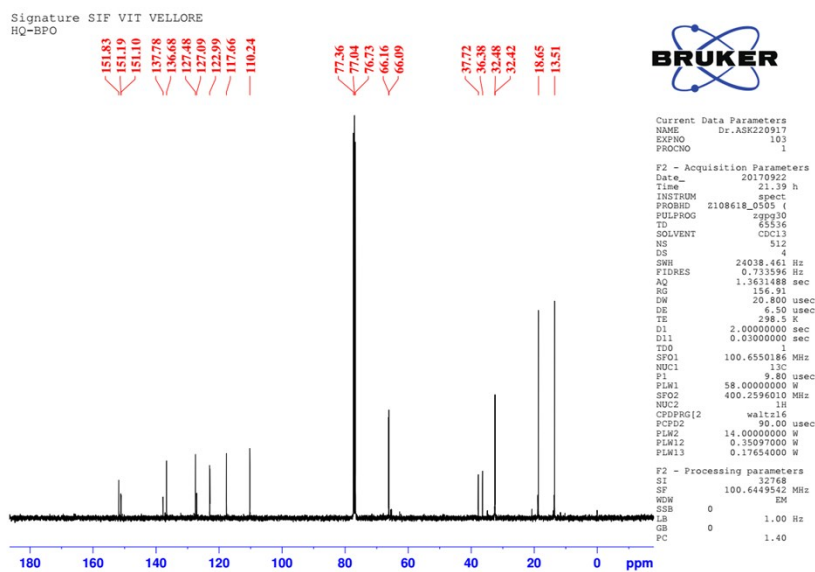

Figure 13S: <sup>13</sup>C NMR spectra of L



Signature SIF VIT VELLORE  
HQ-BPO

136.68  
136.66  
127.50  
127.49  
122.99  
122.96  
117.67  
117.65  
110.24

66.16  
66.09

37.72  
36.38  
32.48  
32.42

18.76  
13.52

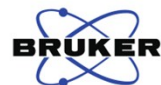

Current Data Parameters  
NAME Dr.ASK270917  
EXPNO 104  
PROCNO 1

F2 - Acquisition Parameters  
Date\_ 20170922  
Time 21.58 h  
INSTRUM spect  
PROBHD z108618\_0505 (PULPROG deptsp135  
TD 65536  
SOLVENT ccc13  
NS 256  
DS 8  
SNR 16129.032 Hz  
FIDRES 0.492219 Hz  
AQ 2.0316160 sec  
RG 199.6  
DW 31.000 usec  
DE 6.50 usec  
TE 298.2 K  
CHST2 145.000000 sec  
D1 2.00000000 sec  
D2 0.0034828 sec  
D12 0.0000200 sec  
TDO 1  
SFO1 100.6530057 MHz  
NUC1 13C  
P1 9.80 usec  
PL1 2000.00 usec  
PLA0 0 W  
PLM1 58.0000000 W  
SFOAM(5) Crp60comp.4  
SFOAL5 0.500  
SFOFFS5 0 Hz  
SFS4 8.51080036 W  
SFO2 400.2596010 MHz  
NUC2 1H  
CFOFFG[2] waltz16  
P3 14.25 usec  
P4 28.50 usec  
PCPD2 90.00 usec  
PLM2 14.0000000 W  
PLM12 0.35097000 W

F2 - Processing parameters  
SI 32768  
SF 100.6449542 MHz  
RGW EM  
SSB 0  
LB 1.00 Hz  
GB 0  
CB 1.40

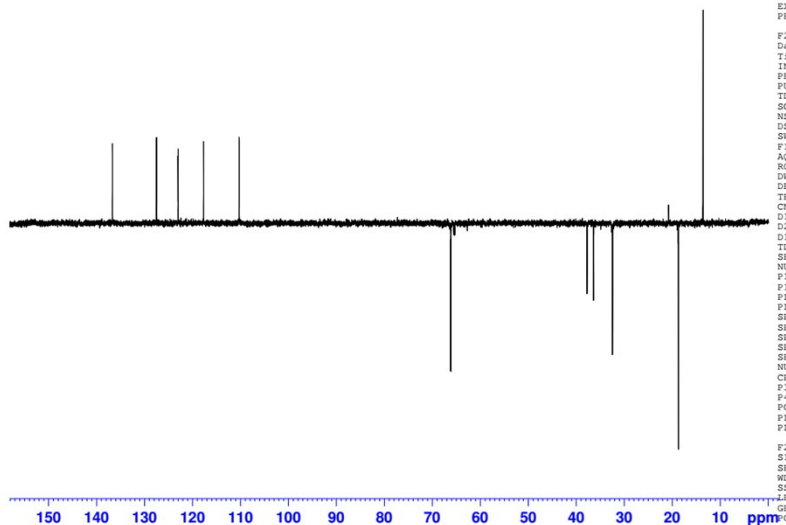

Figure 14S: DEPT-135 NMR spectra of L

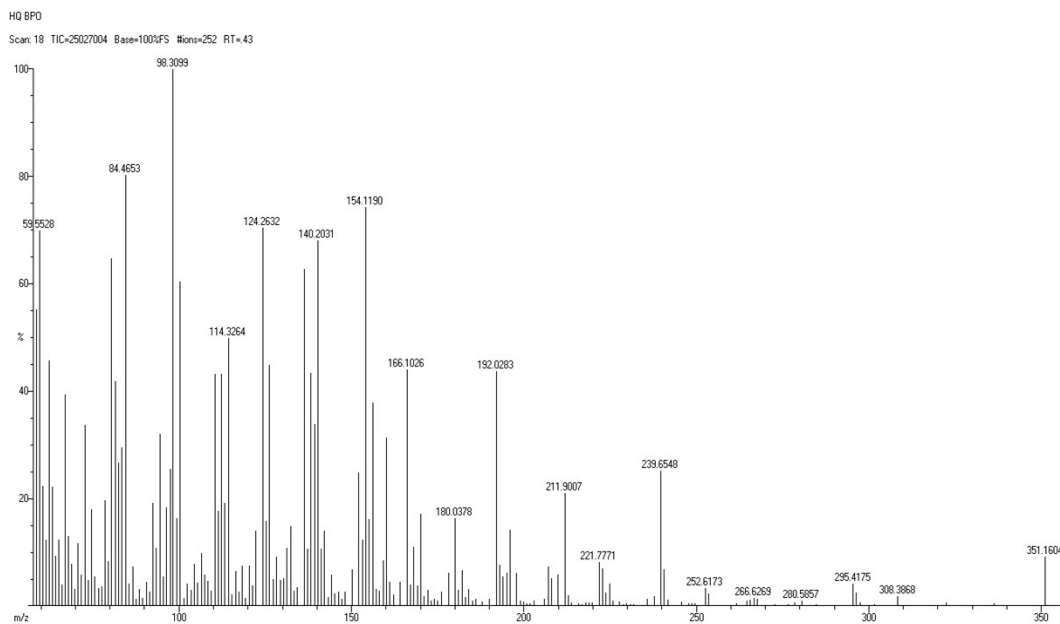

Figure 15S: HR-MS of L

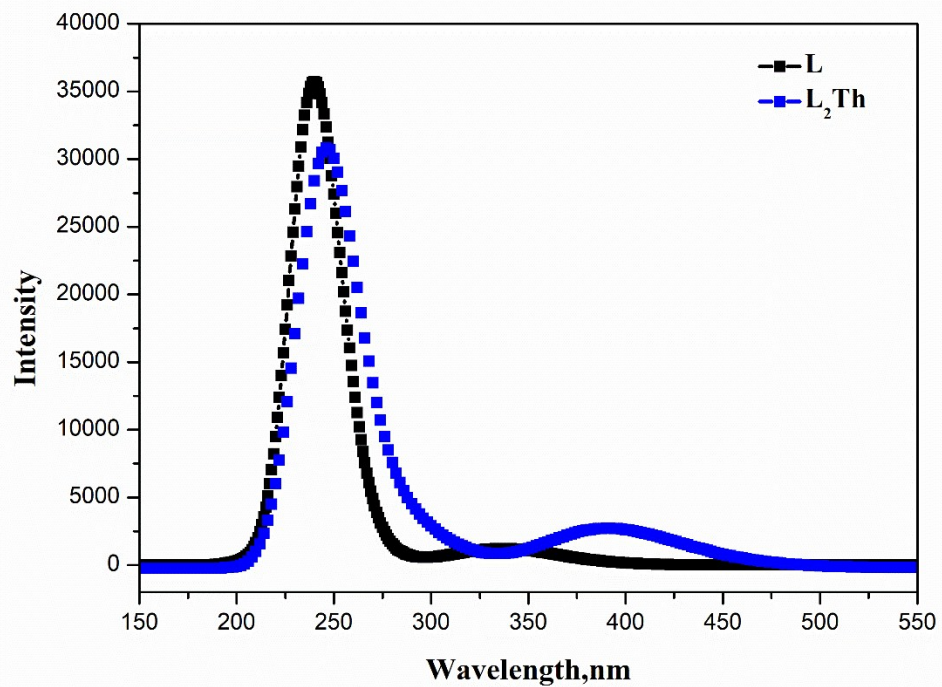

Figure 16S. TDDFT based excitation spectra of L and L<sub>2</sub>Th<sup>4+</sup>

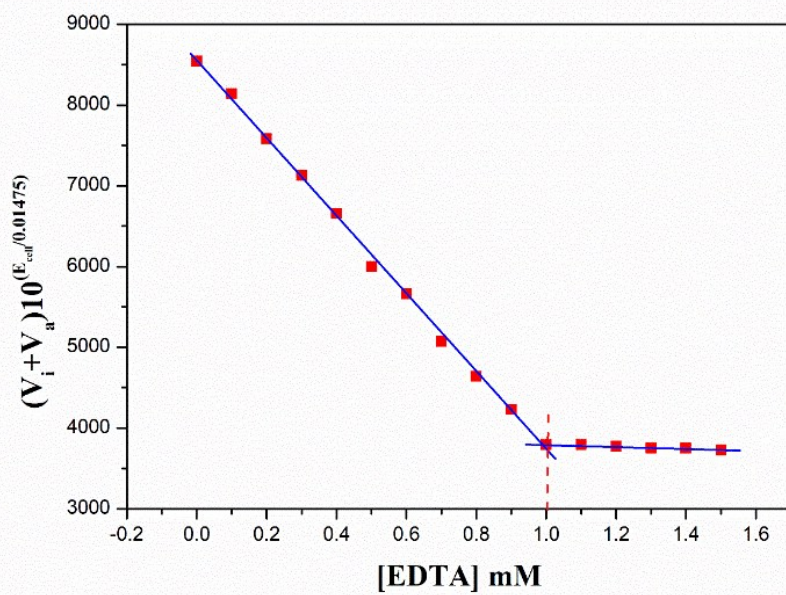

Figure 17S: Potentiometric titration plot represented using Gran's method

**Table 1S.** Comparison of experimental and theoretical UV-Vis spectral characteristics

| <b>Ligand and its complex</b>       | <b>Experimental</b>   |                                                  | <b>Theoretical</b>     |                     |                      |                                                    |
|-------------------------------------|-----------------------|--------------------------------------------------|------------------------|---------------------|----------------------|----------------------------------------------------|
|                                     | $\lambda_{\max}$ (nm) | $\epsilon$ (L M <sup>-1</sup> cm <sup>-1</sup> ) | Excitation energy (nm) | Oscillator strength | Excited state        | Key transitions                                    |
| <b>L</b>                            | 245                   | 10850                                            | 242.15                 | 0.6495              | S0 → S5              | H-1 → L (37%),<br>H → L+2 (19%),<br>H → L+3 (10%), |
|                                     | 310                   | 540                                              | 341.34                 | 0.0298              | S0 → S1              | H → L (96%)                                        |
| <b>L<sub>2</sub>Th<sup>4+</sup></b> | 260                   | 5539                                             | 249.5<br>248.53        | 0.2493<br>0.2377    | So → S25<br>So → S26 | H-3 → L (20%),<br>H → L+11 (20%)                   |
|                                     | 370                   | 290                                              | 392.38                 | 0.0699              | S0 → S1              | H → L (43%),<br>H → L+1 (28%)<br>H-1 → L+1 (20%)   |

**Table 2S.**Analytical performance of ISE-10

| Sample            | Thorium (IV) content (mg/L) |       |       |       |       | Deviation (SD) | Error (SE) | T-test  | P value from t test | 95%CI              |
|-------------------|-----------------------------|-------|-------|-------|-------|----------------|------------|---------|---------------------|--------------------|
|                   | Added                       | R1    | R2    | R3    | Mean  |                |            |         |                     |                    |
| Tap water         | 50                          | 48.75 | 48.24 | 49.45 | 48.81 | 0.6074         | 0.3507     | -3.3834 | 0.07735             | [47.3042, 50.3224] |
| well water        | 50                          | 47.65 | 48.57 | 46.57 | 47.60 | 1.0010         | 0.5779     | -4.1583 | 0.05326             | [45.1098, 50.0834] |
| DD water          | 50                          | 49.52 | 49.14 | 49.57 | 49.41 | 0.23515        | 0.1357     | -4.3456 | 0.04909             | [48.8258, 49.9941] |
| Monazite sand     | 86.2                        | 84.56 | 83.98 | 85.35 | 84.63 | 0.6876         | 0.3970     | -3.9544 | 0.0584              | [82.9217, 86.3382] |
| Gas mantle sample | 24.1                        | 21.58 | 23.45 | 23.89 | 22.97 | 1.2265         | 0.7081     | -1.591  | 0.25626             | [19.9264, 26.0202] |

**Table 3S.**Assessment of present Th<sup>4+</sup>-ISE with previously reported work.

| S.No | Ionophore                                                                                       | Range (Mol)<br>To 1x10 <sup>-1</sup> M | Slope (mV)        | Response<br>time (s) | Detection<br>Limit (Mol)  | Life<br>time | pH<br>Range      |
|------|-------------------------------------------------------------------------------------------------|----------------------------------------|-------------------|----------------------|---------------------------|--------------|------------------|
| 1    | p-tert-butylthiacalix[4]arene derivative[20]                                                    | 8.0 x 10 <sup>-8</sup>                 | 14.9 ±0.6         | 7                    | 8.0 x10 <sup>-8</sup>     | 6            | 2.0 – 9.0        |
| 2    | Thorium 8-hydroxyquinolate[21]                                                                  | 5.0 ×10 <sup>-6</sup>                  | 15.5 ±0.5         | 30                   | 1.6 x10 <sup>-6</sup>     | 2            | 3.0 – 5.0        |
| 3    | Tin(IV) tungstoselenate Pyridine[22]                                                            | 8.0 x 10 <sup>-6</sup>                 | 14.2 ±1.0         | 15                   | 6.0 x10 <sup>-6</sup>     | ***          | 2.5 – 9.0        |
| 4    | 5,11,17,23-Tetra-tert-butyl-25,26,27,28-tetrakis (diphenylphosphinoylmethoxy) calix[4]arene[23] | 1.0 x 10 <sup>-5</sup>                 | 15.5 ±0.1         | 15                   | 7.9 x10 <sup>-6</sup>     | 6            | 2.3 – 4.0        |
| 5    | dithio-tetraaza macrocyclic compound [24]                                                       | 1.0 x 10 <sup>-6</sup>                 | 14.2 ± 0.3        | 10                   | 8.0 ×10 <sup>-7</sup>     | 5            | 3.5 – 9.5        |
| 6    | 2-(diphenylphosphorothioyl)-N',N'-diphenyl acetamide[25]                                        | 1.0 x 10 <sup>-6</sup>                 | 15.2 ± 0.5        | 30                   | 6.3 x10 <sup>-7</sup>     | 1.5          | 3.0 – 9.0        |
| 7    | Aliquat-336[41]                                                                                 | 3.0 x 10 <sup>-5</sup>                 | -29.5 ± 0.3       | 40                   | 1 x10 <sup>-5</sup>       | ***          | ***              |
| 8    | trioctylphosphine oxide [26]                                                                    | 1.0 x 10 <sup>-6</sup>                 | -32.3 ±0.3        | 10                   | 3.2 x10 <sup>-6</sup>     | 2.4          | 2.5 – 4.5        |
| 9    | thorium toluate [27]                                                                            | 1.0 x 10 <sup>-6</sup>                 | -27.2 ±0.2        | 10                   | 4.1 x10 <sup>-6</sup>     | 2.4          | 2.7 – 3.5        |
| 10   | diphosphoryl-dicarboxylicacid-p-tert-butylcalix[4]arene [28]                                    | 2.0 x 10 <sup>-7</sup>                 | 13.9              | 10                   | 9.0 x10 <sup>-8</sup>     | 1.9          | 3.1 – 6.5        |
| 11   | <b>Bibutyl (8-hydroxyquinolin-2-yl) methyl phosphonate (Present work)</b>                       | <b>1 x 10<sup>-7</sup></b>             | <b>31.18 ±0.4</b> | <b>&lt;5</b>         | <b>1 x10<sup>-8</sup></b> | <b>3</b>     | <b>3.5 – 6.5</b> |
